# Supplementary material for: Aminolysis as a surface functionalization method of aliphatic polyester nonwovens: impact on material properties and biological response
Source: Royal Society of Chemistry journal article supplement (doi:10.1039/d2ra00542e), 2022-01-01
Supplement: d2ra00542e1.pdf [file d2ra00542e1.pdf]

Supplementary data:

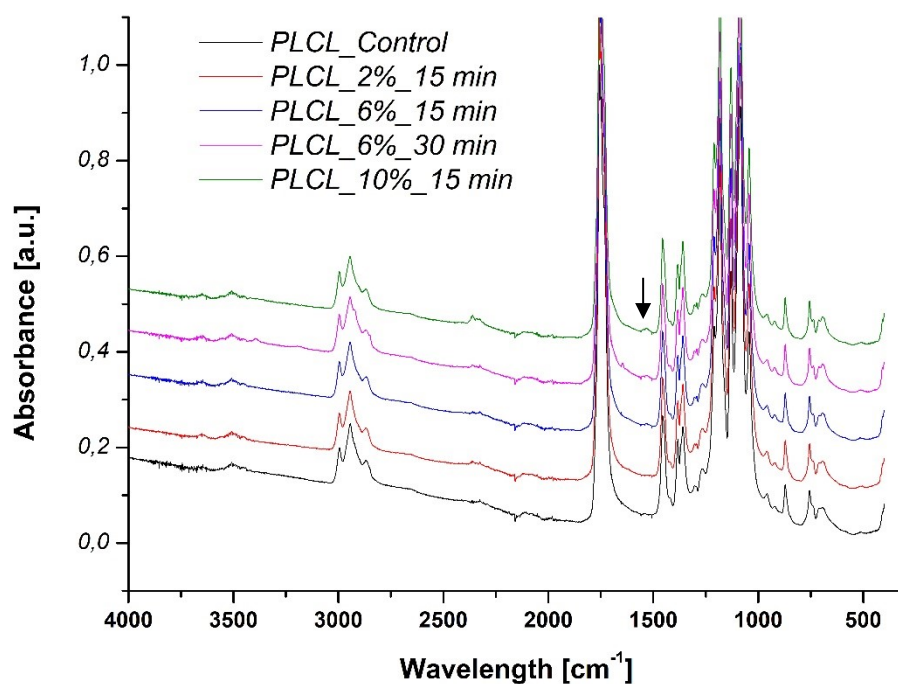

Figure S1. ATR-FTIR spectra of PLCL\_Control and chosen PLCL samples after aminolysis with marked amide II peak.

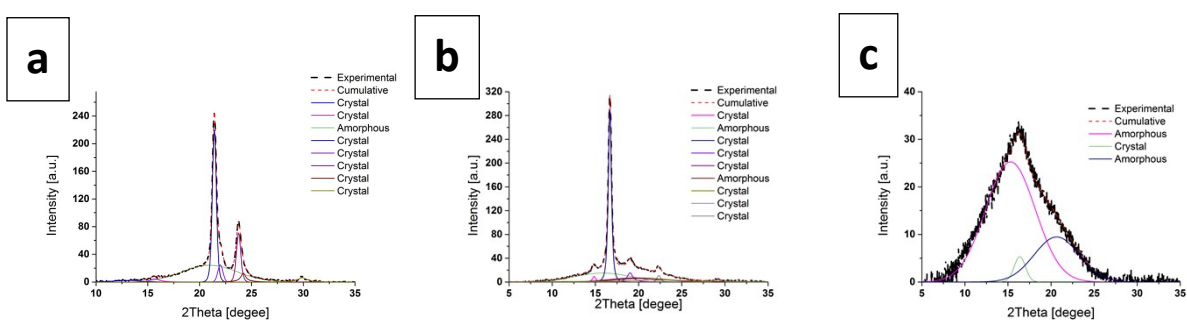

Figure S2. WAXS scattering profiles of: a) PCL\_Control, b) PLCL\_Control and c) PLLA\_Control with fitting.

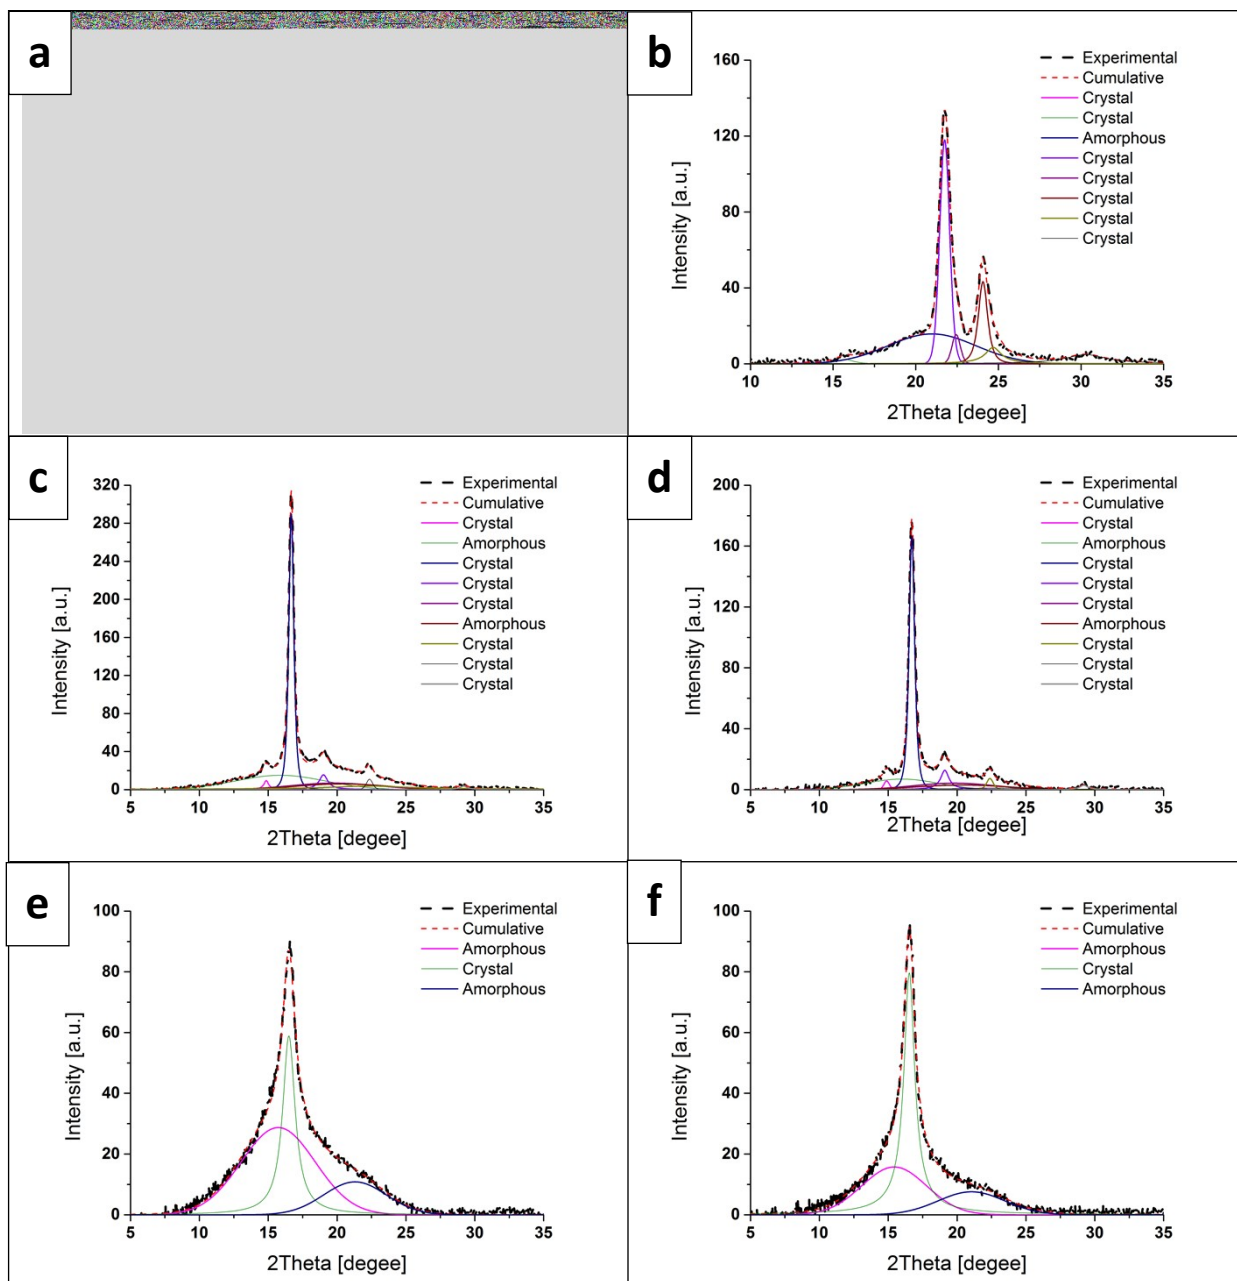

**Figure S3.** WAXS scattering profiles of: a) PCL\_10%\_24h, b) PCL\_30%\_24h, c) PLCL\_2%\_5 min, d) PLCL\_10%\_10 min, e) PLLA\_2%\_5 min, f) PLLA\_6%\_10 min with fitting.
